# Supplementary material for: Isolated non-immune hydrops fetalis: an observational study on complete spontaneous resolution, perinatal outcome, and long-term follow-up
Source: Springer Nature journal article supplement (doi:10.1007/s00404-022-06731-w), 2022-08-22
Supplement: MOESM1 [file 23388920]

**Appendix 1: Classification of the study collective – Details of prenatal ultrasound and laboratory findings**

| Group and details of anomalies     | No         | Group and details of anomalies | No        |
|------------------------------------|------------|--------------------------------|-----------|
| <b>Isolated</b>                    | <b>70</b>  | <b>Lymphatic</b>               | <b>11</b> |
| <b>Chromosomal</b>                 | <b>456</b> | Cystic hygroma colli           | 7         |
| Trisomy 21                         | 173        | Chylothorax                    | 3         |
| Turner                             | 127        | Lymphatic dysplasia            | 1         |
| Trisomy 18                         | 106        | <b>Thoracic</b>                | <b>8</b>  |
| Trisomy 13                         | 21         | Diaphragmatic hernia           | 3         |
| Unbalanced structural anomaly      | 12         | CCAML                          | 3         |
| Triploid                           | 9          | Ectopia cordis                 | 1         |
| Trisomy 14                         | 2          | CHAOS                          | 1         |
| Tetraploid                         | 2          | <b>Urogenital</b>              | <b>7</b>  |
| Trisomy 22                         | 1          | Potter                         | 1         |
| Tetrasomy 12p                      | 1          | Obstructive Uropathy           | 1         |
| Trisomy 23                         | 1          | Infravesical obstruction       | 1         |
| Trisomy 16                         | 1          | Renal agenesis                 | 1         |
| <b>Cardiovascular</b>              | <b>64</b>  | Renal vein thrombosis          | 1         |
| Cardiac arrhythmia                 | 12         | Renal dysfunction              | 1         |
| Other heart defect                 | 8          | LUTO                           | 1         |
| Valvular heart disease             | 7          | <b>Feto-maternal unit</b>      | <b>3</b>  |
| Hypoplastic left heart             | 6          | Placental hematoma             | 1         |
| Cardiomyopathy                     | 5          | Villous maturation disorder    | 1         |
| VSD                                | 5          | Umbilical hernia               | 1         |
| Arteriovenous fistula              | 3          | <b>Gastrointestinal</b>        | <b>3</b>  |
| AVSD                               | 3          | Intrahepatic venous anomaly    | 1         |
| Fallot                             | 2          | Omphalocele                    | 1         |
| Ebstein-Anomalia                   | 2          | Lesions of liver parenchyma    | 1         |
| Coarctation of the aorta           | 2          | <b>Metabolic</b>               | <b>2</b>  |
| Univentricular heart defect        | 2          | Thanatophoric dwarfism         | 1         |
| Interrupted aortic arch            | 2          | Mucopolysaccharidosis          | 1         |
| Hypoplastic right heart            | 2          | <b>Extrathoracic tumor</b>     | <b>2</b>  |
| Double outlet right ventricle      | 1          | Teratoma                       | 2         |
| ASD                                | 1          | <b>Hematologic</b>             | <b>2</b>  |
| Agenesis of ductus venosus         | 1          | Non-immune erythroblastosis    | 1         |
| <b>Infection</b>                   | <b>32</b>  | Unclear anemia                 | 1         |
| Parvovirus                         | 25         | <b>Miscellaneous</b>           | <b>20</b> |
| CMV                                | 5          | Unspecific syndromic           | 8         |
| Toxoplasmosis                      | 1          | Asphyxiated skeletal dysplasia | 2         |
| Coxsackie                          | 1          | Cerebral malformation          | 2         |
| <b>Syndromes</b>                   | <b>20</b>  | Anencephaly-Exencephaly        | 1         |
| Pena shokeir                       | 4          | Exencephaly                    | 1         |
| Pterygium                          | 3          | Iniencephaly                   | 1         |
| Arthrogryposis congenita multiplex | 2          | Cleft lip and palate           | 1         |
| Cantrell                           | 2          | Ventral cleavage               | 1         |
| Dandy Walker                       | 2          | Pachygyria                     | 1         |
| Noonan                             | 2          | Gastroschisis                  | 1         |
| Right sided atrial isomerism       | 1          | Rachischisis                   | 1         |
|                                    |            | <b>Total 700</b>               |           |

ASD: atrial septal defect; AVSD: atrioventricular septal defect; CCAML: congenital cystic adenomatoid malformation; CHAOS: congenital high airway obstruction syndrome; CMV: Cytomegalovirus; LUTO: lower urinary tract obstruction; VSD: ventricular septal defect

## Appendix 2: Results from prenatal and postnatal molecular biology

| Case            | Group             | Prenatal classification on from ultrasound and laboratory findings | Karyotype          | Techniques of molecular biology                                    | Suspected disease                                                   | Genloci/a-cGH Results                                                                                                                                                                                                                                     | Conspicuous findings |
|-----------------|-------------------|--------------------------------------------------------------------|--------------------|--------------------------------------------------------------------|---------------------------------------------------------------------|-----------------------------------------------------------------------------------------------------------------------------------------------------------------------------------------------------------------------------------------------------------|----------------------|
| 1 <sup>a</sup>  | Isolated NIHF     | Isolated NIHF                                                      | 46,XY              | a-CGH (prenatal)                                                   | Chromosomal microdeletions and microduplications                    | No abnormal a-CGH Results                                                                                                                                                                                                                                 | No                   |
| 2               | Non-isolated NIHF | Unbalanced structural anomaly                                      | 46,XXadd(4)(p15.2) | a-CGH (prenatal)                                                   | Chromosomal microdeletions and microduplications                    | 1. Deletion 4p16.3 to 4p16.1 (size 8.8Mb, containing 94 genes).<br>2. Duplication 4p16.1 to 4p15.31 (size 10 Mb, containing 29 genes)<br>3. Duplication 4q25 to 28.3 (size 24.7 Mb, 90 genes)<br>4. Duplication 4q28.3 to q35.2 (size 57.6 Mb, 184 genes) | Yes                  |
| 3               | Non-isolated NIHF | Cardiac arrhythmia                                                 | 46,XY              | Direct DNA sequencing (prenatal)                                   | Noonan-Syndrome. Genes: PtPn11, SOS1, RAF1 and KRAS                 | PTPN11: exons 1-15. SOS1 exons: 3,4,6,7,10,11,13,14,15. RAF1: exons 7, 14, 17. Kras: 2,3,4,5,6.                                                                                                                                                           | No                   |
| 4               | Non-isolated NIHF | Hygroma colli                                                      | 46,XX              | Direct DNA sequencing (prenatal)                                   | Noonan-Syndrome. Genes: PtPn11, SOS1, RAF1 and KRAS                 | PTPN11: exons 1-15. SOS1 exons: 3,4,6,7,10,11,13,14,15. RAF1: exons 7, 14, 17. Kras: 2,3,4,5,6.                                                                                                                                                           | No                   |
| 5               | Non-isolated NIHF | CMV Infection                                                      | 46, XY             | DNA sequencing with multiplex PCR and oligo-ligation (prenatal)    | Cystic fibrosis. Gen: CTFR.                                         | 31 mutations                                                                                                                                                                                                                                              | No                   |
| 6               | Non-isolated NIHF | Ventricular septal defect                                          | 46, XY             | DNA sequencing with multiplex PCR and oligo-ligation (prenatal)    | Noonan-Syndrome. Gen: PtPn11                                        | PTPN11: exons 3,8,13                                                                                                                                                                                                                                      | No                   |
| 7               | Non-isolated NIHF | Ebstein-Anomalia                                                   | 46,XX              | MLPA (Multiplex ligation-dependent probe amplification) (prenatal) | 1. Beckwith-Wiedemann-Syndrome<br>2. Noonan-Syndrome                | Quantitative analysis: Exclusion of deletions or duplications on 11p15; Microsatellite analysis: Exclusion of uniparental disomy 11 (No CDKN1C sequencing); Methylation analysis: KvDMR1 und H19-DMR                                                      | No                   |
| 8               | Non-isolated NIHF | Hypoplastic left heart                                             | 46,XX              | Molecular cytogenetic FisH (prenatal)                              | DiGeorge-Syndrome. Gen: 22q11.2                                     | D22S553, D22S609, D22S942                                                                                                                                                                                                                                 | No                   |
| 9               | Non-isolated NIHF | Tetralogy of Fallot                                                | 46,XX              | Molecular cytogenetic FisH (prenatal)                              | DiGeorge-Syndrome. Gen: 22q11.2                                     | D22S553, D22S609, D22S942                                                                                                                                                                                                                                 | No                   |
| 10              | Non-isolated NIHF | Complex structural heart defect                                    | 46,XY              | Molecular cytogenetic FisH (prenatal)                              | 1. DiGeorge 22q11<br>2. Noonan-Syndrome 10p14                       | 22q11: D22S553, D22S609, D22S942.                                                                                                                                                                                                                         | No                   |
| 11 <sup>b</sup> | Isolated NIHF     | Isolated NIHF                                                      | 46,XX              | a-CGH (postnatal)                                                  | Unspecified syndrome                                                | 1. Duplication 4q31<br>2. Heterozygous deletion 6p12<br>3. Insertion 19q13 (size 350 kb)                                                                                                                                                                  | Yes                  |
| 12 <sup>c</sup> | Isolated NIHF     | Isolated NIHF                                                      | 46,XY              | a-CGH (postnatal)                                                  | 1. Hellkamp-Syndrome<br>2. Noonan-Syndrome<br>3. Metabolic disorder | Duplication 4p15.33 (size 472-495 kb)                                                                                                                                                                                                                     | Yes                  |

aCGH: array comparative genomic hybridization; NIHF: non-immune hydrops fetalis

<sup>a</sup> Case 12 in the individual case survey on anomalies in the long-term development of iNIHF (Table 3)

<sup>b</sup> Case 2 in the individual case survey on anomalies in the long-term development of iNIHF (Table 3)

<sup>c</sup> Case 8 in the individual case survey on anomalies in the long-term development of iNIHF (Table 3)
